# Supplementary material for: Antibiotic use for acute respiratory infections among under-5 children in Bangladesh: a population-based survey
Source: PubMed Central journal article supplement — BMJ Glob Health. 2021 Apr 26;6(4):e004010. doi: 10.1136/bmjgh-2020-004010 (PMC8076944; doi:10.1136/bmjgh-2020-004010), 2021-04-26
Supplement: bmjgh-2020-004010supp001.pdf [file bmjgh-2020-004010supp001.pdf]

*Antibiotic use for ARI among under-five children in Bangladesh*

## **Supplementary Appendix**

This appendix has been provided by the authors to give readers additional information about our study.

*Antibiotic use for ARI among under-five children in Bangladesh*  
**Supplementary Table 1**

Explanatory variables and minimal sufficient adjustment set of covariates used in multivariable logistic regression models to quantify effects on antibiotic consumption for ARI episode among children of aged less than five years, 2014, Bangladesh

| Exposure variables                    | Minimal sufficient set of covariates                                                        | Effect measured  |
|---------------------------------------|---------------------------------------------------------------------------------------------|------------------|
| Mother age (year)                     | Wasted, unqualified practitioner, other sectors, age of child, place of residence           | Total            |
| Age of father (year)                  | Wasted, unqualified practitioner, other sectors, age of child, place of residence           | Total            |
| Age of child (month)                  | Wasted, healthcare professional, unqualified practitioner, other sectors                    | Total            |
| Sex                                   | Wasted, unqualified practitioner, other sectors, age of child, place of residence           | Total            |
| Type of place of residence            | Wasted, other sectors, age of the child                                                     | Direct and total |
| Divisions                             | Wasted, unqualified practitioner, private medical sector, other sectors, place of residence | Total            |
| Wealth quintile                       | Wasted, unqualified practitioner, private medical sector, other sectors, place of residence | Total            |
| Father education                      | Wasted, age of the child, unqualified practitioner, other sectors, place of residence       | Total            |
| Father occupation                     | Wasted, age of the child, unqualified practitioner, other sectors, place of residence       | Total            |
| Mother education                      | Wasted, age of the child, unqualified practitioner, other sectors, place of residence       | Total            |
| Mother occupation                     | Wasted, age of the child, unqualified practitioner, other sectors, place of residence       | Total            |
| Stunted <sup>1</sup>                  | Wasted, unqualified practitioner, other sectors, place of residence                         | Total            |
| Wasted                                | Unqualified practitioner, other sectors, place of residence                                 | Direct and total |
| Underweight                           | Wasted unqualified practitioner, other sectors, place of residence                          | Total            |
| Healthcare professional /worker       | Public sector, other sectors, place of residence                                            | Total            |
| Unqualified/ traditional practitioner | Public sector, other sectors, place of residence                                            | Direct and total |
| Public sector                         | Wasted, unqualified practitioner, place of residence                                        | Total            |
| NGO sector                            | Wasted, unqualified practitioner, place of residence                                        | Total            |
| Private sector                        | Wasted, unqualified practitioner, place of residence                                        | Total            |

*Antibiotic use for ARI among under-five children in Bangladesh*

|        |                             |                  |
|--------|-----------------------------|------------------|
| Others | Wasted , place of residence | Direct and total |
|--------|-----------------------------|------------------|
